# Supplementary material
Source: HighWire-hosted journal article supplement (https://hw-f5-jim.highwire.org/content/70/3/853)
Supplement: inline-supplementary-material-1 [file inline-supplementary-material-1.pdf]

**Search strategy from each database up to October 21<sup>st</sup>, 2020****Search strategy for OVID MEDLINE database.**

| Step | Search Term                                                                                                                  |
|------|------------------------------------------------------------------------------------------------------------------------------|
| 1    | "Hepatitis E" OR "HEV"                                                                                                       |
| 2    | "transplant" OR "transplantation" OR "transplant recipients"                                                                 |
| 3    | "outcome*" OR "mortality" OR "death" OR "incidence" OR "graft function" OR "graft failure" OR "graft survival" OR "survival" |
| 4    | 1 AND 2 AND 3                                                                                                                |

Search results: 262

**Search strategy for EMBASE database.**

("hepatitis E" or "HEV") AND ("transplant" or "transplantation" or "transplant recipients") AND ("outcome\*" or "mortality" or "death" or "incidence" or "graft function" or "graft failure" or "graft survival" or "survival")

Search results: 561

**Search strategy for Cochrane Database for Systematic Reviews**

("hepatitis E" or "HEV") AND ("transplant" or "transplantation" or "transplant recipients") AND ("outcome\*" or "mortality" or "death" or "incidence" or "graft function" or "graft failure" or "graft survival" or "survival")

Search results: 235
